# Supplementary material
Source: Springer Nature journal article supplement (https://www.springermedizin.de/resource/supplementary/12885_2011_2711_MOESM5_ESM.pdf/9461760)

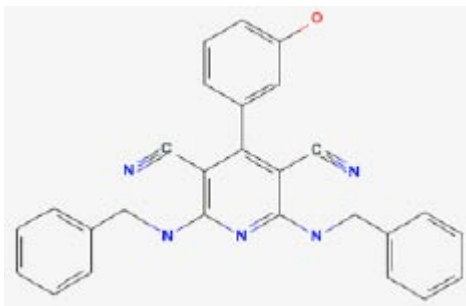

**NSC 734406: 2,6-bis(benzylamino)-4-(3-hydroxyphenyl)pyridine-3,5-dicarbonitrile**

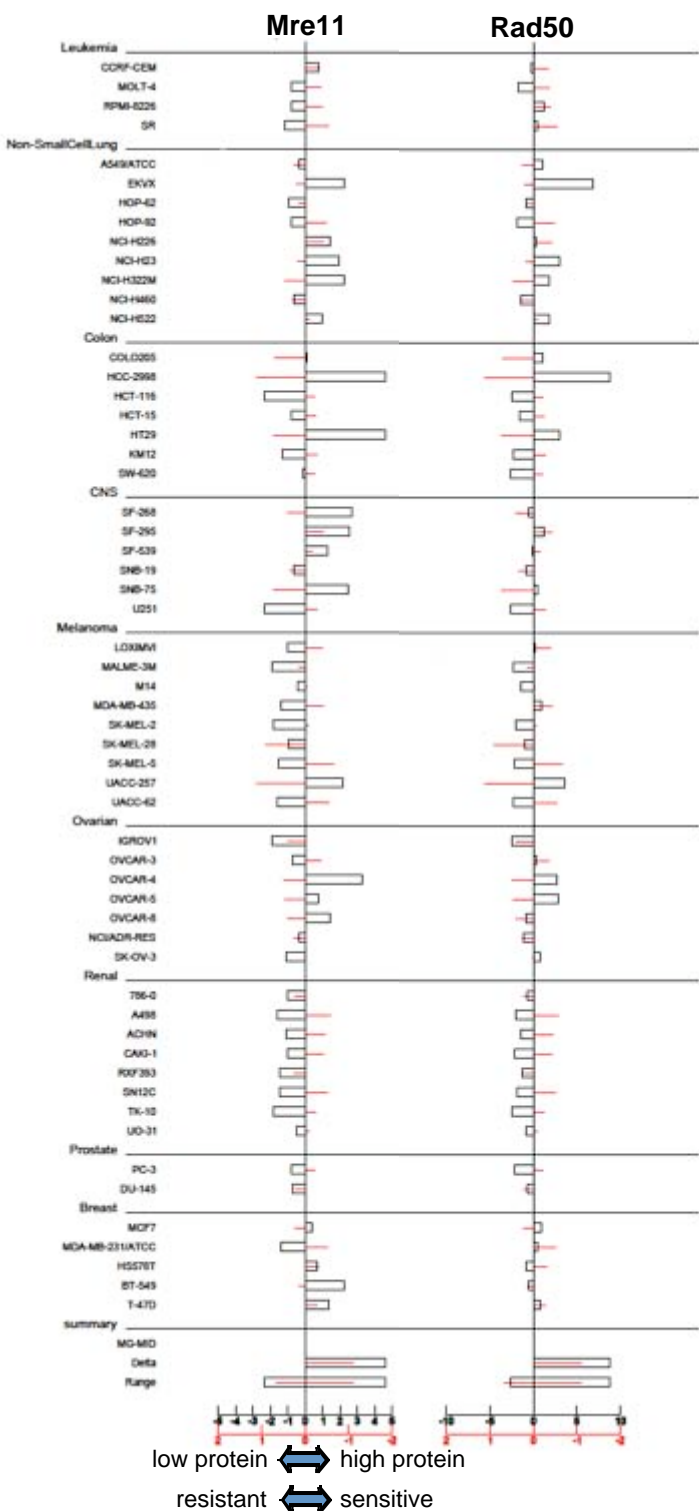

Supplement: MOESM5 [file 9461760]
